# Supplementary material for: Immunogenicity and Safety of SARS-CoV-2 Protein Subunit Recombinant Vaccine (IndoVac®) as a Booster Dose against COVID-19 in Indonesian Adults
Source: MDPI journal article supplement (doi:10.3390/vaccines12050540), 2024-05-14
Supplement: s1 [file s1]

## Supplementary Materials

**Table S1.** Demographic characteristics.

| CoronaVac® group          |              |           |        |           |        |          |        | ChAdOx1 group |        |           |         |           |        | BNT162b2 group |     |           |      |          |        |
|---------------------------|--------------|-----------|--------|-----------|--------|----------|--------|---------------|--------|-----------|---------|-----------|--------|----------------|-----|-----------|------|----------|--------|
| Parameters                |              | IndoVac®  |        | BNT162b2  |        | Total    |        | IndoVac®      |        | BNT162b2  |         | Total     |        | IndoVac®       |     | BNT162b2- |      | Total    |        |
|                           |              | vaccine   |        |           |        |          |        | vaccine       |        | vaccine   |         |           |        | vaccine        |     | vaccine   |      |          |        |
|                           |              | (n = 150) |        | (n = 150) |        | (N =300) |        | (n = 150)     |        | (n = 150) |         | (N = 300) |        | (n = 49)       |     | (n = 47)  |      | (N = 96) |        |
| Mean age                  | [years] (SD) | 38.9      | (12.9) | 36.9      | (13.9) | 37.9     | (13.4) | 36.8          | (12.24 | 37.5      | (12.45) | 37.21     | (12.33 | 37.16          | 2.0 | 35.       | (11. | 36.      | (11.56 |
|                           |              |           |        |           |        |          |        | 8             | )      | 4         |         |           | )      |                | 0)  | 64        | 17)  | 42       | )      |
| Mean height               | [cm] (SD)    | 156.      | (9.21) | 157.      | (9.2)  | 157.     | (9.2)  | 158.          | (9.99) | 157.      | (8.92)  | 157.5     | (9.47) | 155.75         | 08  | 156       | (8.6 | 155      | (8.84) |
|                           |              | 4         |        | 8         |        | 1        |        | 03            |        | 01        |         | 2         |        |                | )   | .02       | 7)   | .88      |        |
| Mean weight               | [kg] (SD)    | 61.0      | (12.9) | 61.8      | (13.9) | 61.4     | (13.4) | 63.1          | (12.81 | 62.5      | (13.38) | 62.85     | (13.08 | 57.07          | 2.2 | 63.       | (16. | 60.      | (14.88 |
|                           |              |           |        | 5         |        |          |        | 1             | )      | 9         |         |           | )      |                | 0)  | 13        | 82)  | 04       | )      |
| BMI (kg/m²)               |              | 24.9      | (5.0)  | 24.7      | (4.7)  | 24.8     | (4.8)  | 25.3          | (4.82) | 25.4      | (5.35)  | 25.38     | (5.08) | 23.68          | 50  | 25.       | (6.5 | 24.      | (6.09) |
|                           |              |           |        |           |        |          |        | 1             |        | 6         |         |           |        |                | )   | 96        | 1)   | 79       |        |
| Sex, n(%)                 |              |           |        |           |        |          |        |               |        |           |         |           |        |                |     |           |      |          |        |
| Male                      |              | 53        | (35.33 | 59        | (39.33 | 112      | (37.3  | 70            | (46.67 | 69        | (46.00  | 139       | (46.33 | 17             | 4.6 | 20        | 55%  | 37       | (38.54 |
|                           |              |           | %)     |           | %)     |          | 3%)    |               | %)     |           | %)      |           | %)     |                | 9   |           | )    |          | %)     |
| Female                    |              | 97        | (64.67 | 91        | (60.67 | 188      | (62.6  | 80            | (53.33 | 81        | (54.00  | 161       | (53.67 | 32             | 5.3 | 27        | 45%  | 59       | (61.46 |
|                           |              |           | %)     |           | %)     |          | 7%)    |               | %)     |           | %)      |           | %)     |                | 1   |           | )    |          | %)     |
| Previous education, n(%)  |              |           |        |           |        |          |        |               |        |           |         |           |        |                |     |           |      |          |        |
| Primary school (some)     |              | 5         | (3.33  | 1         | (0.67  | 6        | (2.00  | 2             | (1.33  | 4         | (2.67%) | 6         | (2.00  | 0              | 00  | 1         | (2.1 | 1        | (1.04  |
|                           |              |           | %)     |           | %)     |          | %)     |               | %)     |           |         |           | %)     |                | 0)  |           | 3%)  |          | %)     |
| Primary school (complete) |              | 16        | (10.67 | 15        | (10.00 | 31       | (10.3  | 22            | (14.67 | 24        | (16.00  | 46        | (15.33 | 6              | 2.2 | 4         | (8.5 | 10       | (10.42 |
|                           |              |           | %)     |           | %)     |          | 3%)    |               | %)     |           | %)      |           | %)     |                | 4   |           | 1%)  |          | %)     |
| Junior high school        |              | 28        | (18.67 | 29        | (19.33 | 57       | (19.0  | 25            | (16.67 | 34        | (22.67  | 59        | (19.67 | 10             | 0.4 | 13        | 66%  | 23       | (23.96 |
|                           |              |           | %)     |           | %)     |          | 0%)    |               | %)     |           | %)      |           | %)     |                | 1   |           | )    |          | %)     |

| CoronaVac® group                       |           |          |           |          |          | ChAdOx1 group |           |          |           |          |           | BNT162b2 group |          |         |           |          |          |          |
|----------------------------------------|-----------|----------|-----------|----------|----------|---------------|-----------|----------|-----------|----------|-----------|----------------|----------|---------|-----------|----------|----------|----------|
| Parameters                             | IndoVac®  |          | BNT162b2  |          | Total    |               | IndoVac®  |          | BNT162b2  |          | Total     |                | IndoVac® |         | BNT162b2- |          | Total    |          |
|                                        | vaccine   |          |           |          |          |               | vaccine   |          | vaccine   |          |           | vaccine        |          | vaccine |           |          |          |          |
|                                        | (n = 150) |          | (n = 150) |          | (N =300) |               | (n = 150) |          | (n = 150) |          | (N = 300) |                | (n = 49) |         | (n = 47)  |          | (N = 96) |          |
| Senior high school                     | 78        | (52.00%) | 88        | (58.67%) | 166      | (55.33%)      | 83        | (55.33%) | 77        | (51.33%) | 160       | (53.33%)       | 27       | 5.10%   | 23        | (48.94%) | 50       | (52.08%) |
| College or university (diploma)        | 8         | (5.33%)  | 8         | (5.33%)  | 16       | (5.33%)       | 4         | (2.67%)  | 6         | (4.00%)  | 10        | (3.33%)        | 2        | 4.08%   | 2         | (4.26%)  | 4        | (4.17%)  |
| College or university (bachelor)       | 11        | (7.33%)  | 7         | (4.67%)  | 18       | (6.00%)       | 12        | (8.00%)  | 4         | (2.67%)  | 16        | (5.33%)        | 4        | 8.16%   | 4         | (8.51%)  | 8        | (8.33%)  |
| Master's or doctoral degree            | 2         | (1.33%)  | 2         | (1.33%)  | 4        | (1.33%)       | 0         | (0.00%)  | 0         | (0.00%)  | 0         | 0.00%          | 0        | 0.00%   | 0         | (0.00%)  | 0        | (0.00%)  |
| NA                                     | 2         | (1.33%)  | 0         | (0.00%)  | 2        | (0.67%)       | 2         | (1.33%)  | 1         | (0.67%)  | 3         | (1.00%)        | 0        | 0.00%   | 0         | (0.00%)  | 0        | (0.00%)  |
| Employment, n(%)                       |           |          |           |          |          |               |           |          |           |          |           |                |          |         |           |          |          |          |
| Yes                                    |           |          |           |          | 205      | (68.33%)      |           |          |           |          | 220       | (73.33%)       |          |         |           |          | 62       | (64.58%) |
| State employee/military/police officer | 1         | (0.67%)  | 1         | (0.67%)  | 2        | (0.67%)       | 0         | (0.00%)  | 0         | (0.00%)  | 0         | (0.00%)        | 0        | 0.00%   | 1         | (2.13%)  | 1        | (1.04%)  |
| State-owned enterprise                 | 19        | (12.67%) | 30        | (20.00%) | 49       | (16.33%)      | 48        | (32.00%) | 42        | (28.00%) | 90        | (30.00%)       | 15       | 30.61%  | 17        | (36.17%) | 32       | (33.33%) |
| Entrepreneur                           | 15        | (10.00%) | 15        | (10.00%) | 30       | (10.00%)      | 10        | (6.67%)  | 20        | (13.33%) | 30        | (10.00%)       | 2        | 4.08%   | 2         | (4.26%)  | 4        | (4.17%)  |
| Labourer                               | 5         | (3.33%)  | 2         | (1.33%)  | 7        | (2.33%)       | 15        | (10.00%) | 11        | (7.33%)  | 26        | (8.67%)        | 2        | 4.08%   | 2         | (4.26%)  | 4        | (4.17%)  |

| CoronaVac® group |    |                      |    |           |     |                   | ChAdOx1 group        |         |                      |    |                    |                     | BNT162b2 group |                     |     |                   |       |        |
|------------------|----|----------------------|----|-----------|-----|-------------------|----------------------|---------|----------------------|----|--------------------|---------------------|----------------|---------------------|-----|-------------------|-------|--------|
| Parameters       |    | IndoVac®             |    | BNT162b2  |     | Total<br>(N =300) | IndoVac®             |         | BNT162b2             |    | Total<br>(N = 300) | IndoVac®            |                | BNT162b2-           |     | Total<br>(N = 96) |       |        |
|                  |    | vaccine<br>(n = 150) |    | (n = 150) |     |                   | vaccine<br>(n = 150) |         | vaccine<br>(n = 150) |    |                    | vaccine<br>(n = 49) |                | vaccine<br>(n = 47) |     |                   |       |        |
|                  |    |                      |    |           |     |                   |                      |         |                      |    |                    |                     |                |                     |     |                   |       |        |
| Others           | 60 | (40.00               |    | (38.00    |     | 117               | (39.0                |         | (26.00               |    | 35                 | (23.33              |                | (24.67              |     | (2                |       | (21.88 |
|                  |    | %)                   | 57 | %)        | 0%) | 39                | %)                   | 23.33   | 74                   | %) | 12                 | 4.4                 | 9              | 15%                 | 21  | %)                |       |        |
|                  |    |                      |    |           |     |                   |                      |         |                      |    |                    |                     |                |                     |     |                   |       |        |
| No               | 50 | (33.33               |    | (30.00    |     | 95                | (31.6                |         | (25.33               |    | 42                 | (28.00              |                | (26.67              |     | (3                |       | (35.42 |
|                  |    | %)                   | 45 | %)        | 7%) | 38                | %)                   | 28.00   | 80                   | %) | 18                 | 6.7                 | 3              | 04%                 | 34  | %)                |       |        |
|                  |    |                      |    |           |     |                   |                      |         |                      |    |                    |                     |                |                     |     |                   |       |        |
| Ethnicity,       |    |                      |    |           |     |                   |                      |         |                      |    |                    |                     |                |                     |     |                   |       |        |
| n(%)             |    |                      |    |           |     |                   |                      |         |                      |    |                    |                     |                |                     |     |                   |       |        |
| Alor             | 11 | (7.33                |    | (6.67     |     | 21                | (7.00                |         | (6.67                |    | 13                 | (8.67%              |                | (7.67               |     | (0.               |       | (1.04  |
|                  |    | %)                   | 10 | %)        | %)  | 10                | %)                   | (8.67%  | 23                   | %) | 0                  | 00                  | 1              | (2.1                | 1   | %)                |       |        |
|                  |    |                      |    |           |     |                   |                      |         |                      |    |                    |                     |                |                     |     |                   |       |        |
| Balinese         | 40 | (26.67               |    | (26.00    |     | 79                | (26.3                |         | (47.33               |    | 69                 | (46.00              |                | (46.67              |     | (2.               |       | (3.13  |
|                  |    | %)                   | 39 | %)        | 3%) | 71                | %)                   | (46.00  | 140                  | %) | 1                  | 04                  | 2              | (4.2                | 3   | %)                |       |        |
|                  |    |                      |    |           |     |                   |                      |         |                      |    |                    |                     |                |                     |     |                   |       |        |
| Batak            | 2  | (1.33                |    | (0.67     |     | 3                 | (1.00                |         | (0.00                |    | 0                  | (0.00%)             |                |                     |     | (0.               |       | 0.00%  |
|                  |    | %)                   | 1  | %)        | %)  | 0                 | %)                   | (0.00%) | 0                    |    | 0                  | 00                  | 0              | (0.0                | 0   | %)                |       |        |
|                  |    |                      |    |           |     |                   |                      |         |                      |    |                    |                     |                |                     |     |                   |       |        |
| Betawi           | 1  | (0.67                |    | (0.00     |     | 1                 | (0.33                |         | (0.00                |    | 0                  | (0.00%)             |                |                     |     | (0.               |       | (1.04  |
|                  |    | %)                   | 0  | %)        | %)  | 0                 | %)                   | (0.00%) | 0                    |    | 0                  | 00                  | 1              | (2.1                | 1   | %)                |       |        |
|                  |    |                      |    |           |     |                   |                      |         |                      |    |                    |                     |                |                     |     |                   |       |        |
| Buton            | 0  | (0.00                |    | (0.67     |     | 1                 | (0.33                |         | (0.00                |    | 0                  | (0.00%)             |                |                     |     | (0.               |       | 0.00%  |
|                  |    | %)                   | 1  | %)        | %)  | 0                 | %)                   | (0.00%) | 0                    |    | 0                  | 00                  | 0              | (0.0                | 0   | %)                |       |        |
|                  |    |                      |    |           |     |                   |                      |         |                      |    |                    |                     |                |                     |     |                   |       |        |
| Javanese         | 20 | (13.33               |    | (15.33    |     | 43                | (14.3                |         | (12.67               |    | 19                 | (12.67              |                | (12.67              |     | (1                |       | (20.83 |
|                  |    | %)                   | 23 | %)        | 3%) | 19                | %)                   | (12.67  | 38                   | %) | 8                  | 6.3                 | 12             | (25.                | 20  | %)                |       |        |
|                  |    |                      |    |           |     |                   |                      |         |                      |    |                    |                     |                |                     |     |                   |       |        |
| Lewae            | 0  | (0.00                |    | (0.00     |     | 0                 |                      |         | (0.00                |    | 0                  |                     |                |                     | (2. |                   | (1.04 |        |
|                  |    | %)                   | 0  | %)        | %)  | 0                 | %)                   | (0.00   | 0                    |    | 1                  | 04                  | 0              | (0.0                | 1   | %)                |       |        |
|                  |    |                      |    |           |     |                   |                      |         |                      |    |                    |                     |                |                     |     |                   |       |        |
| Malay            | 0  | (0.00                |    | (0.67     |     | 1                 | (0.33                |         | (0.00                |    | 1                  | (0.67%)             |                | (0.33               |     | (0.               |       | 0      |
|                  |    | %)                   | 1  | %)        | %)  | 0                 | %)                   | (0.67%) | 1                    | %) | 0                  | 00                  | 0              | (0.0                | 0   | %)                |       |        |
|                  |    |                      |    |           |     |                   |                      |         |                      |    |                    |                     |                |                     |     |                   |       |        |
| Minangkab<br>au  | 3  | (2.00                |    | (0.67     |     | 4                 | (1.33                |         | (0.67                |    | 0                  | (0.00%)             |                | (0.33               |     | (0.               |       | 0      |
|                  |    | %)                   | 1  | %)        | %)  | 1                 | %)                   | (0.00%) | 1                    | %) | 0                  | 00                  | 0              | (0.0                | 0   | %)                |       |        |

| CoronaVac® group |           |        |    |           |     |       |           |        |    | ChAdOx1 group |    |        |           | BNT162b2 group |     |           |    |     |          |   |    |          |  |
|------------------|-----------|--------|----|-----------|-----|-------|-----------|--------|----|---------------|----|--------|-----------|----------------|-----|-----------|----|-----|----------|---|----|----------|--|
| Parameters       | IndoVac®  |        |    | BNT162b2  |     |       | IndoVac®  |        |    | BNT162b2      |    |        | IndoVac®  |                |     | BNT162b2- |    |     |          |   |    |          |  |
|                  | vaccine   |        |    | (n = 150) |     |       | vaccine   |        |    | vaccine       |    |        | vaccine   |                |     | vaccine   |    |     |          |   |    |          |  |
|                  | (n = 150) |        |    | (N = 300) |     |       | (n = 150) |        |    | (n = 150)     |    |        | (N = 300) |                |     | (n = 49)  |    |     | (n = 47) |   |    | (N = 96) |  |
| Sasak            | 0         | (0.00  | 2  | (1.33     | 2   | (0.67 | 1         | (0.67  | 1  | (0.67%)       | 2  | (0.67  | 0         | (0.            | 00  | (0.0      | 0  | 0   |          |   |    |          |  |
|                  |           | %)     |    | %)        |     | %)    |           | %)     |    | %)            |    | %)     |           | 00             |     | 0%)       |    |     |          |   |    |          |  |
| Sundanese        | 73        | (48.67 | 72 | (48.00    | 145 | (48.3 | 48        | (32.00 | 47 | (31.33        | 95 | (31.67 | 39        | (7             | 9.5 | (65.      | 31 | 96% | 70       |   |    |          |  |
|                  |           | %)     |    | %)        |     | 3%)   |           | %)     |    | %)            |    | %)     |           | 9              |     | )         |    |     |          | ) | %) |          |  |

Table S2. Serological results.

| MICRONEUTRALISING                       |                  |                  |         |                  |                  |         |                  |                  |         | IGG              |                  |         |                  |                  |            |                  |                  |         |                  |
|-----------------------------------------|------------------|------------------|---------|------------------|------------------|---------|------------------|------------------|---------|------------------|------------------|---------|------------------|------------------|------------|------------------|------------------|---------|------------------|
| CORONAVAC®                              |                  |                  |         |                  | CHADOX1          |         |                  |                  |         | BNT162B2         |                  |         |                  |                  | CORONAVAC® |                  |                  |         |                  |
| Time Point                              | IndoVac® vaccine | BNT162b2 Vaccine | p-Value    | IndoVac® vaccine | BNT162b2 vaccine | p-Value | IndoVac® vaccine |
| Before booster V1                       | 147              | 147              |         | 149              | 148              |         | 49               | 46               |         | 147              | 147              |         | 149              | 148              |            | 49               | 46               |         |                  |
| Seropositive rate                       | 113 (77%)        | 121 (82%)        | 0.247   | 129 (87%)        | 126 (85%)        | 0.721   | 44 (90%)         | 40 (87%)         | 0.666   | 145 (98%)        | 146 (99%)        | 0.562   | 149 (100%)       | 148 (100%)       | .a         | 49 (100%)        | 46 (100%)        | .a      |                  |
| 14 days after the booster dose V2       | 147              | 147              |         | 149              | 148              |         | 49               | 46               |         | 147              | 147              | .a      | 149              | 148              |            | 49               | 46               |         |                  |
| Seropositive rate                       | 145 (99%)        | 147 (100%)       | 0.156   | 148 (99%)        | 148 (100%)       | 0.318   | 49 (100%)        | 46 (100%)        | .a      | 100              | 100              |         | 149 (100%)       | 148 (100%)       | .a         | 49 (100%)        | 46 (100%)        | .a      |                  |
| Seroconversion 4-fold increase antibody | 74 (65%)         | 98 (81%)         | 0.007*  | 70 (54%)         | 88 (70%)         | 0.01*   | 18 (41%)         | 30 (75%)         | 0.002*  | 116 (80%)        | 126 (86%)        | 0.151   | 92 (61%)         | 108 (72%)        | 0.039*     | 30 (61%)         | 39 (84%)         | 0.01*   |                  |
| Seronegative to seropositive            | 32 (94%)         | 26 (100%)        | 0.208   | 19 (95%)         | 22 (100%)        | 0.288   | 5 (100%)         | 6 (100%)         | .a      | 2 (100%)         | 1 (100%)         | .a      | 0                | 0                | 0          | 0                | 0                | 0       |                  |
| Seroresponse rate                       | 102 (69%)        | 123 (84%)        | 0.004*  | 85 (57%)         | 110 (74%)        | 0.002*  | 22 (45%)         | 35 (76%)         | 0.002*  | 118 (80%)        | 127 (86%)        | 0.159   | 92 (61%)         | 108 (72%)        | 0.039*     | 30 (61%)         | 39 (84%)         | 0.01*   |                  |
| 28 days after                           | 146              | 146              |         | 149              | 148              |         | 49               | 46               |         | 146              | 146              |         | 149              | 148              |            | 49               | 46               |         |                  |

V2

| Seropositive |           |       |           |       |           |           |    |        |        |    |        |        |    |                        |
|--------------|-----------|-------|-----------|-------|-----------|-----------|----|--------|--------|----|--------|--------|----|------------------------|
|              | 146       |       | 148       |       |           |           |    | 146    | 146    |    | 149    | 148    |    |                        |
|              | 144 (99%) | 0.156 | 147 (99%) | 0.157 | 49 (100%) | 46 (100%) | .a |        |        | .a |        |        | .a | 49 (100%) 46 (100%) .a |
| rate         | (100%)    |       | (100%)    |       |           |           |    | (100%) | (100%) |    | (100%) | (100%) |    |                        |

### Seroconversion

[illegible]

Seronegative to  
seropositive

|              |          |           |       |          |           |       |          |          |    |          |          |    |   |   |   |   |   |   |
|--------------|----------|-----------|-------|----------|-----------|-------|----------|----------|----|----------|----------|----|---|---|---|---|---|---|
| seropositive | 32 (94%) | 26 (100%) | 0.208 | 18 (90%) | 22 (100%) | 0.129 | 5 (100%) | 6 (100%) | .a | 2 (100%) | 1 (100%) | .a | 0 | 0 | 0 | 0 | 0 | 0 |
|--------------|----------|-----------|-------|----------|-----------|-------|----------|----------|----|----------|----------|----|---|---|---|---|---|---|

Seroresponse  
rate

|      |           |           |       |          |          |        |          |          |       |           |           |       |          |          |       |          |          |       |
|------|-----------|-----------|-------|----------|----------|--------|----------|----------|-------|-----------|-----------|-------|----------|----------|-------|----------|----------|-------|
| rate | 109 (75%) | 117 (80%) | 0.263 | 77 (52%) | 96 (65%) | 0.021* | 27 (55%) | 33 (72%) | 0.093 | 114 (78%) | 115 (79%) | 0.887 | 92 (61%) | 96 (64%) | 0.577 | 30 (61%) | 33 (71%) | 0.279 |
|------|-----------|-----------|-------|----------|----------|--------|----------|----------|-------|-----------|-----------|-------|----------|----------|-------|----------|----------|-------|

90 days

**after**

the

booster participants

**dose**

V3

| Seropositive |           |           |       |           |     |       |           |          |       |        |           |         |        |        |
|--------------|-----------|-----------|-------|-----------|-----|-------|-----------|----------|-------|--------|-----------|---------|--------|--------|
|              | 144 (99%) | 145 (99%) | 0.570 | 144 (99%) | 146 | 0.156 | 49 (100%) | 44 (98%) | 0.294 | 145    | 147(100%) | <0.001* | 146    | 146    |
| rate         |           |           |       | (100%)    |     |       |           |          |       | (100%) |           |         | (100%) | (100%) |

### Seroconversion

|                 |                 |          |          |       |          |          |       |          |          |       |         |        |          |          |       |
|-----------------|-----------------|----------|----------|-------|----------|----------|-------|----------|----------|-------|---------|--------|----------|----------|-------|
| <b>antibody</b> | 4-fold increase | 53 (48%) | 65 (54%) | 0.363 | 67 (53%) | 56 (45%) | 0.205 | 19 (43%) | 20 (51%) | 0.461 | <0.001* | 0.013* | 22 (45%) | 20 (44%) | 0.965 |
|                 |                 |          |          |       |          |          |       |          | (70%)    | (47%) | (51%)   | (37%)  |          |          |       |

Seronegative to  
seropositive

|              |          |          |       |          |           |       |          |         |       |          |          |    |   |   |   |   |   |   |
|--------------|----------|----------|-------|----------|-----------|-------|----------|---------|-------|----------|----------|----|---|---|---|---|---|---|
| seropositive | 33 (97%) | 24 (92%) | 0.403 | 18 (90%) | 22 (100%) | 0.129 | 5 (100%) | 5 (83%) | 0.338 | 2 (100%) | 1 (100%) | .a | 0 | 0 | 0 | 0 | 0 | 0 |
|--------------|----------|----------|-------|----------|-----------|-------|----------|---------|-------|----------|----------|----|---|---|---|---|---|---|

Seroresponse  
rate

|              |     |    |    |    |  |  |  |  |  |  |  |  |  |  |  |  |  |  |  |  |  |  |  |  |  |  |  |  |  |  |  |  |  |  |  |  |  |  |  |  |  |  |  |  |  |  |  |  |  |  |  |  |  |  |  |  |  |  |  |  |  |  |  |  |  |  |  |  |  |  |  |  |  |  |  |  |  |  |  |  |  |  |  |  |  |  |  |  |  |  |  |  |  |  |  |  |  |  |  |  |  |  |  |  |  |  |  |  |  |  |  |  |  |  |  |  |  |  |  |  |  |  |  |  |  |  |  |  |  |  |  |  |  |  |  |  |  |  |  |  |  |  |  |  |  |  |  |  |  |  |  |  |  |  |  |  |  |  |  |  |  |  |  |  |  |  |  |  |  |  |  |  |  |  |  |  |  |  |  |  |  |  |  |  |  |  |  |  |  |  |  |  |  |  |  |  |  |  |  |  |  |  |  |  |  |  |  |  |  |  |  |  |  |  |  |  |  |  |  |  |  |  |  |  |  |  |  |  |  |  |  |  |  |  |  |  |  |  |  |  |  |  |  |  |  |  |  |  |  |  |  |  |  |  |  |  |  |  |  |  |  |  |  |  |  |  |  |  |  |  |  |  |  |  |  |  |  |  |  |  |  |  |  |  |  |  |  |  |  |  |  |  |  |  |  |  |  |  |  |  |  |  |  |  |  |  |  |  |  |  |  |  |  |  |  |  |  |  |  |  |  |  |  |  |  |  |  |  |  |  |  |  |  |  |  |  |  |  |  |  |  |  |  |  |  |  |  |  |  |  |  |  |  |  |  |  |  |  |  |  |  |  |  |  |  |  |  |  |  |  |  |  |  |  |  |  |  |  |  |  |  |  |  |  |  |  |  |  |  |  |  |  |  |  |  |  |  |  |  |  |  |  |  |  |  |  |  |  |  |  |  |  |  |  |  |  |  |  |  |  |  |  |  |  |  |  |  |  |  |  |  |  |  |  |  |  |  |  |  |  |  |  |  |  |  |  |  |  |  |  |  |  |  |  |  |  |  |  |  |  |  |  |  |  |  |  |  |  |  |  |  |  |  |  |  |  |  |  |  |  |  |  |  |  |  |  |  |  |  |  |  |  |  |  |  |  |  |  |  |  |  |  |  |  |  |  |  |  |  |  |  |  |  |  |  |  |  |  |  |  |  |  |  |  |  |  |  |  |  |  |  |  |  |  |  |  |  |  |  |  |  |  |  |  |  |  |  |  |  |  |  |  |  |  |  |  |  |  |  |  |  |  |  |  |  |  |  |  |  |  |  |  |  |  |  |  |  |  |  |  |  |  |  |  |  |  |  |  |  |  |  |  |  |  |  |  |  |  |  |  |  |  |  |  |  |  |  |  |  |  |  |  |  |  |  |  |  |  |  |  |  |  |  |  |  |  |  |  |  |  |  |  |  |  |  |  |  |  |  |  |  |  |  |  |  |  |  |  |  |  |  |  |  |  |  |  |  |  |  |  |  |  |  |  |  |  |  |  |  |  |  |  |  |  |  |  |  |  |  |  |  |  |  |  |  |  |  |  |  |  |  |  |  |  |  |  |  |  |  |  |  |  |  |  |  |  |  |  |  |  |  |  |  |  |  |  |  |  |  |  |  |  |  |  |  |  |  |  |  |  |  |  |  |  |  |  |  |  |  |  |  |  |  |  |  |  |  |  |  |  |  |  |  |  |  |  |  |  |  |  |  |  |  |  |  |  |  |  |  |  |  |  |  |  |  |  |  |  |  |  |  |  |  |  |  |  |  |  |  |  |  |  |  |  |  |  |  |  |  |  |  |  |  |  |  |  |  |  |  |  |  |  |  |  |  |  |  |  |  |  |  |  |  |  |  |  |  |  |  |  |  |  |  |  |  |  |  |  |  |  |  |  |  |  |  |  |  |  |  |  |  |  |  |  |  |  |  |  |  |  |  |  |  |  |  |  |  |  |  |  |  |  |  |  |  |  |  |  |  |  |  |  |  |  |  |  |  |  |  |  |  |  |  |  |  |  |  |  |  |  |  |  |  |  |  |  |  |  |  |  |  |  |  |  |  |  |  |  |  |  |  |  |  |  |  |  |  |  |  |  |  |  |  |  |  |  |  |  |  |  |  |  |  |  |  |  |  |  |  |  |  |  |  |  |  |  |  |  |  |  |  |  |  |  |  |  |  |  |  |  |  |  |  |  |  |  |  |  |  |  |  |  |  |  |  |  |  |  |  |  |  |  |  |  |  |  |  |  |  |  |  |  |  |  |  |  |  |  |  |  |  |  |  |  |  |  |  |  |  |  |  |  |  |  |  |  |  |  |  |  |  |  |  |  |  |  |  |  |  |  |  |  |  |  |  |  |  |  |  |  |  |  |  |  |  |  |  |  |  |  |  |  |  |  |  |  |  |  |  |  |  |  |  |  |  |  |  |  |  |  |  |  |  |  |  |  |  |  |  |  |  |  |  |  |  |  |  |  |  |  |  |  |  |  |  |  |  |  |  |  |  |  |  |  |  |  |  |  |  |  |  |  |  |  |  |  |  |  |  |  |  |  |  |  |  |  |  |  |  |  |  |  |  |  |  |  |  |  |  |  |  |  |  |  |  |  |  |  |  |  |  |  |  |  |  |  |  |  |  |  |  |  |  |  |  |  |  |  |  |  |  |  |  |  |  |  |  |  |  |  |  |  |  |  |  |  |  |  |  |  |  |  |  |  |  |  |  |  |  |  |  |  |  |  |  |  |  |  |  |  |  |  |  |  |  |  |  |  |  |  |  |  |  |  |  |  |  |  |  |  |  |  |  |  |  |  |  |  |  |  |  |  |  |  |  |  |  |  |  |  |  |  |  |  |  |  |  |  |  |  |  |  |  |  |  |  |  |  |  |  |  |  |  |  |  |  |  |  |  |  |  |  |  |  |  |  |  |  |  |  |  |  |  |  |  |  |  |  |  |  |  |  |  |  |  |  |  |  |  |  |  |  |  |  |  |  |  |  |  |  |  |  |  |  |  |  |  |  |  |  |  |  |  |  |  |  |  |  |  |  |  |  |  |  |  |  |  |  |  |  |  |  |  |  |  |  |  |  |  |  |  |  |  |  |  |  |  |  |  |  |  |  |  |  |  |  |  |  |  |  |  |  |  |  |  |  |  |  |  |  |  |  |  |  |  |  |  |  |  |  |  |  |  |  |  |  |  |  |  |  |  |  |  |  |  |  |  |  |  |  |  |  |  |  |  |  |  |  |  |  |  |  |  |  |  |  |  |  |  |  |  |  |  |  |  |  |  |  |  |  |  |  |  |  |  |  |  |  |  |  |  |  |  |  |  |  |  |  |  |  |  |  |  |  |  |  |  |  |  |  |  |  |  |  |  |  |  |  |  |  |  |  |  |  |  |  |  |  |  |  |  |  |  |  |  |  |  |  |  |  |  |  |  |  |  |  |  |  |  |  |  |  |  |  |  |  |  |  |  |  |  |  |  |  |  |  |  |  |  |  |  |  |  |  |  |  |  |  |  |  |  |  |  |  |  |  |  |  |  |  |  |  |  |  |  |  |  |  |  |  |  |  |  |  |  |  |  |  |  |  |  |  |  |  |  |  |  |  |  |  |  |  |  |  |  |  |  |  |  |  |  |  |  |  |  |  |  |  |  |  |  |  |  |  |  |  |  |  |  |  |  |  |  |  |  |  |  |  |  |  |  |  |  |  |  |  |  |  |  |  |  |  |  |  |  |  |  |  |  |  |  |  |  |  |  |  |  |  |  |  |  |  |  |  |  |  |  |  |  |  |  |  |  |  |  |  |  |  |  |  |  |    |
|--------------|-----|----|----|----|--|--|--|--|--|--|--|--|--|--|--|--|--|--|--|--|--|--|--|--|--|--|--|--|--|--|--|--|--|--|--|--|--|--|--|--|--|--|--|--|--|--|--|--|--|--|--|--|--|--|--|--|--|--|--|--|--|--|--|--|--|--|--|--|--|--|--|--|--|--|--|--|--|--|--|--|--|--|--|--|--|--|--|--|--|--|--|--|--|--|--|--|--|--|--|--|--|--|--|--|--|--|--|--|--|--|--|--|--|--|--|--|--|--|--|--|--|--|--|--|--|--|--|--|--|--|--|--|--|--|--|--|--|--|--|--|--|--|--|--|--|--|--|--|--|--|--|--|--|--|--|--|--|--|--|--|--|--|--|--|--|--|--|--|--|--|--|--|--|--|--|--|--|--|--|--|--|--|--|--|--|--|--|--|--|--|--|--|--|--|--|--|--|--|--|--|--|--|--|--|--|--|--|--|--|--|--|--|--|--|--|--|--|--|--|--|--|--|--|--|--|--|--|--|--|--|--|--|--|--|--|--|--|--|--|--|--|--|--|--|--|--|--|--|--|--|--|--|--|--|--|--|--|--|--|--|--|--|--|--|--|--|--|--|--|--|--|--|--|--|--|--|--|--|--|--|--|--|--|--|--|--|--|--|--|--|--|--|--|--|--|--|--|--|--|--|--|--|--|--|--|--|--|--|--|--|--|--|--|--|--|--|--|--|--|--|--|--|--|--|--|--|--|--|--|--|--|--|--|--|--|--|--|--|--|--|--|--|--|--|--|--|--|--|--|--|--|--|--|--|--|--|--|--|--|--|--|--|--|--|--|--|--|--|--|--|--|--|--|--|--|--|--|--|--|--|--|--|--|--|--|--|--|--|--|--|--|--|--|--|--|--|--|--|--|--|--|--|--|--|--|--|--|--|--|--|--|--|--|--|--|--|--|--|--|--|--|--|--|--|--|--|--|--|--|--|--|--|--|--|--|--|--|--|--|--|--|--|--|--|--|--|--|--|--|--|--|--|--|--|--|--|--|--|--|--|--|--|--|--|--|--|--|--|--|--|--|--|--|--|--|--|--|--|--|--|--|--|--|--|--|--|--|--|--|--|--|--|--|--|--|--|--|--|--|--|--|--|--|--|--|--|--|--|--|--|--|--|--|--|--|--|--|--|--|--|--|--|--|--|--|--|--|--|--|--|--|--|--|--|--|--|--|--|--|--|--|--|--|--|--|--|--|--|--|--|--|--|--|--|--|--|--|--|--|--|--|--|--|--|--|--|--|--|--|--|--|--|--|--|--|--|--|--|--|--|--|--|--|--|--|--|--|--|--|--|--|--|--|--|--|--|--|--|--|--|--|--|--|--|--|--|--|--|--|--|--|--|--|--|--|--|--|--|--|--|--|--|--|--|--|--|--|--|--|--|--|--|--|--|--|--|--|--|--|--|--|--|--|--|--|--|--|--|--|--|--|--|--|--|--|--|--|--|--|--|--|--|--|--|--|--|--|--|--|--|--|--|--|--|--|--|--|--|--|--|--|--|--|--|--|--|--|--|--|--|--|--|--|--|--|--|--|--|--|--|--|--|--|--|--|--|--|--|--|--|--|--|--|--|--|--|--|--|--|--|--|--|--|--|--|--|--|--|--|--|--|--|--|--|--|--|--|--|--|--|--|--|--|--|--|--|--|--|--|--|--|--|--|--|--|--|--|--|--|--|--|--|--|--|--|--|--|--|--|--|--|--|--|--|--|--|--|--|--|--|--|--|--|--|--|--|--|--|--|--|--|--|--|--|--|--|--|--|--|--|--|--|--|--|--|--|--|--|--|--|--|--|--|--|--|--|--|--|--|--|--|--|--|--|--|--|--|--|--|--|--|--|--|--|--|--|--|--|--|--|--|--|--|--|--|--|--|--|--|--|--|--|--|--|--|--|--|--|--|--|--|--|--|--|--|--|--|--|--|--|--|--|--|--|--|--|--|--|--|--|--|--|--|--|--|--|--|--|--|--|--|--|--|--|--|--|--|--|--|--|--|--|--|--|--|--|--|--|--|--|--|--|--|--|--|--|--|--|--|--|--|--|--|--|--|--|--|--|--|--|--|--|--|--|--|--|--|--|--|--|--|--|--|--|--|--|--|--|--|--|--|--|--|--|--|--|--|--|--|--|--|--|--|--|--|--|--|--|--|--|--|--|--|--|--|--|--|--|--|--|--|--|--|--|--|--|--|--|--|--|--|--|--|--|--|--|--|--|--|--|--|--|--|--|--|--|--|--|--|--|--|--|--|--|--|--|--|--|--|--|--|--|--|--|--|--|--|--|--|--|--|--|--|--|--|--|--|--|--|--|--|--|--|--|--|--|--|--|--|--|--|--|--|--|--|--|--|--|--|--|--|--|--|--|--|--|--|--|--|--|--|--|--|--|--|--|--|--|--|--|--|--|--|--|--|--|--|--|--|--|--|--|--|--|--|--|--|--|--|--|--|--|--|--|--|--|--|--|--|--|--|--|--|--|--|--|--|--|--|--|--|--|--|--|--|--|--|--|--|--|--|--|--|--|--|--|--|--|--|--|--|--|--|--|--|--|--|--|--|--|--|--|--|--|--|--|--|--|--|--|--|--|--|--|--|--|--|--|--|--|--|--|--|--|--|--|--|--|--|--|--|--|--|--|--|--|--|--|--|--|--|--|--|--|--|--|--|--|--|--|--|--|--|--|--|--|--|--|--|--|--|--|--|--|--|--|--|--|--|--|--|--|--|--|--|--|--|--|--|--|--|--|--|--|--|--|--|--|--|--|--|--|--|--|--|--|--|--|--|--|--|--|--|--|--|--|--|--|--|--|--|--|--|--|--|--|--|--|--|--|--|--|--|--|--|--|--|--|--|--|--|--|--|--|--|--|--|--|--|--|--|--|--|--|--|--|--|--|--|--|--|--|--|--|--|--|--|--|--|--|--|--|--|--|--|--|--|--|--|--|--|--|--|--|--|--|--|--|--|--|--|--|--|--|--|--|--|--|--|--|--|--|--|--|--|--|--|--|--|--|--|--|--|--|--|--|--|--|--|--|--|--|--|--|--|--|--|--|--|--|--|--|--|--|--|--|--|--|--|--|--|--|--|--|--|--|--|--|--|--|--|--|--|--|--|--|--|--|--|--|--|--|--|--|--|--|--|--|--|--|--|--|--|--|--|--|--|--|--|--|--|--|--|--|--|--|--|--|--|--|--|--|--|--|--|--|--|--|--|--|--|--|--|--|--|--|--|--|--|--|--|--|--|--|--|--|--|--|--|--|--|--|--|--|--|--|--|--|--|--|--|--|--|--|--|--|--|--|--|--|--|--|--|--|--|--|--|--|--|--|--|--|--|--|--|--|--|--|--|--|--|--|--|--|--|--|--|--|--|--|--|--|--|--|--|--|--|--|--|--|--|--|--|--|--|--|--|--|--|--|--|--|--|--|--|--|--|--|--|--|--|--|--|--|--|--|--|--|--|--|--|--|--|--|--|--|--|--|--|--|--|--|--|--|--|--|--|--|--|--|--|--|--|--|--|--|--|--|--|--|--|--|--|--|--|--|--|--|--|--|--|--|--|--|--|--|--|--|--|--|--|--|--|--|--|--|--|--|--|--|--|--|--|--|--|--|--|--|--|--|--|--|--|--|--|--|--|--|--|--|--|--|--|--|--|--|--|--|--|--|--|--|--|--|--|--|--|--|--|--|--|--|--|--|--|--|--|--|--|--|--|--|--|--|--|--|--|--|--|--|--|--|--|--|--|--|--|--|--|--|--|--|--|--|--|--|--|--|--|--|--|----|
| Seroresponse | 102 | 70 | 75 | 54 |  |  |  |  |  |  |  |  |  |  |  |  |  |  |  |  |  |  |  |  |  |  |  |  |  |  |  |  |  |  |  |  |  |  |  |  |  |  |  |  |  |  |  |  |  |  |  |  |  |  |  |  |  |  |  |  |  |  |  |  |  |  |  |  |  |  |  |  |  |  |  |  |  |  |  |  |  |  |  |  |  |  |  |  |  |  |  |  |  |  |  |  |  |  |  |  |  |  |  |  |  |  |  |  |  |  |  |  |  |  |  |  |  |  |  |  |  |  |  |  |  |  |  |  |  |  |  |  |  |  |  |  |  |  |  |  |  |  |  |  |  |  |  |  |  |  |  |  |  |  |  |  |  |  |  |  |  |  |  |  |  |  |  |  |  |  |  |  |  |  |  |  |  |  |  |  |  |  |  |  |  |  |  |  |  |  |  |  |  |  |  |  |  |  |  |  |  |  |  |  |  |  |  |  |  |  |  |  |  |  |  |  |  |  |  |  |  |  |  |  |  |  |  |  |  |  |  |  |  |  |  |  |  |  |  |  |  |  |  |  |  |  |  |  |  |  |  |  |  |  |  |  |  |  |  |  |  |  |  |  |  |  |  |  |  |  |  |  |  |  |  |  |  |  |  |  |  |  |  |  |  |  |  |  |  |  |  |  |  |  |  |  |  |  |  |  |  |  |  |  |  |  |  |  |  |  |  |  |  |  |  |  |  |  |  |  |  |  |  |  |  |  |  |  |  |  |  |  |  |  |  |  |  |  |  |  |  |  |  |  |  |  |  |  |  |  |  |  |  |  |  |  |  |  |  |  |  |  |  |  |  |  |  |  |  |  |  |  |  |  |  |  |  |  |  |  |  |  |  |  |  |  |  |  |  |  |  |  |  |  |  |  |  |  |  |  |  |  |  |  |  |  |  |  |  |  |  |  |  |  |  |  |  |  |  |  |  |  |  |  |  |  |  |  |  |  |  |  |  |  |  |  |  |  |  |  |  |  |  |  |  |  |  |  |  |  |  |  |  |  |  |  |  |  |  |  |  |  |  |  |  |  |  |  |  |  |  |  |  |  |  |  |  |  |  |  |  |  |  |  |  |  |  |  |  |  |  |  |  |  |  |  |  |  |  |  |  |  |  |  |  |  |  |  |  |  |  |  |  |  |  |  |  |  |  |  |  |  |  |  |  |  |  |  |  |  |  |  |  |  |  |  |  |  |  |  |  |  |  |  |  |  |  |  |  |  |  |  |  |  |  |  |  |  |  |  |  |  |  |  |  |  |  |  |  |  |  |  |  |  |  |  |  |  |  |  |  |  |  |  |  |  |  |  |  |  |  |  |  |  |  |  |  |  |  |  |  |  |  |  |  |  |  |  |  |  |  |  |  |  |  |  |  |  |  |  |  |  |  |  |  |  |  |  |  |  |  |  |  |  |  |  |  |  |  |  |  |  |  |  |  |  |  |  |  |  |  |  |  |  |  |  |  |  |  |  |  |  |  |  |  |  |  |  |  |  |  |  |  |  |  |  |  |  |  |  |  |  |  |  |  |  |  |  |  |  |  |  |  |  |  |  |  |  |  |  |  |  |  |  |  |  |  |  |  |  |  |  |  |  |  |  |  |  |  |  |  |  |  |  |  |  |  |  |  |  |  |  |  |  |  |  |  |  |  |  |  |  |  |  |  |  |  |  |  |  |  |  |  |  |  |  |  |  |  |  |  |  |  |  |  |  |  |  |  |  |  |  |  |  |  |  |  |  |  |  |  |  |  |  |  |  |  |  |  |  |  |  |  |  |  |  |  |  |  |  |  |  |  |  |  |  |  |  |  |  |  |  |  |  |  |  |  |  |  |  |  |  |  |  |  |  |  |  |  |  |  |  |  |  |  |  |  |  |  |  |  |  |  |  |  |  |  |  |  |  |  |  |  |  |  |  |  |  |  |  |  |  |  |  |  |  |  |  |  |  |  |  |  |  |  |  |  |  |  |  |  |  |  |  |  |  |  |  |  |  |  |  |  |  |  |  |  |  |  |  |  |  |  |  |  |  |  |  |  |  |  |  |  |  |  |  |  |  |  |  |  |  |  |  |  |  |  |  |  |  |  |  |  |  |  |  |  |  |  |  |  |  |  |  |  |  |  |  |  |  |  |  |  |  |  |  |  |  |  |  |  |  |  |  |  |  |  |  |  |  |  |  |  |  |  |  |  |  |  |  |  |  |  |  |  |  |  |  |  |  |  |  |  |  |  |  |  |  |  |  |  |  |  |  |  |  |  |  |  |  |  |  |  |  |  |  |  |  |  |  |  |  |  |  |  |  |  |  |  |  |  |  |  |  |  |  |  |  |  |  |  |  |  |  |  |  |  |  |  |  |  |  |  |  |  |  |  |  |  |  |  |  |  |  |  |  |  |  |  |  |  |  |  |  |  |  |  |  |  |  |  |  |  |  |  |  |  |  |  |  |  |  |  |  |  |  |  |  |  |  |  |  |  |  |  |  |  |  |  |  |  |  |  |  |  |  |  |  |  |  |  |  |  |  |  |  |  |  |  |  |  |  |  |  |  |  |  |  |  |  |  |  |  |  |  |  |  |  |  |  |  |  |  |  |  |  |  |  |  |  |  |  |  |  |  |  |  |  |  |  |  |  |  |  |  |  |  |  |  |  |  |  |  |  |  |  |  |  |  |  |  |  |  |  |  |  |  |  |  |  |  |  |  |  |  |  |  |  |  |  |  |  |  |  |  |  |  |  |  |  |  |  |  |  |  |  |  |  |  |  |  |  |  |  |  |  |  |  |  |  |  |  |  |  |  |  |  |  |  |  |  |  |  |  |  |  |  |  |  |  |  |  |  |  |  |  |  |  |  |  |  |  |  |  |  |  |  |  |  |  |  |  |  |  |  |  |  |  |  |  |  |  |  |  |  |  |  |  |  |  |  |  |  |  |  |  |  |  |  |  |  |  |  |  |  |  |  |  |  |  |  |  |  |  |  |  |  |  |  |  |  |  |  |  |  |  |  |  |  |  |  |  |  |  |  |  |  |  |  |  |  |  |  |  |  |  |  |  |  |  |  |  |  |  |  |  |  |  |  |  |  |  |  |  |  |  |  |  |  |  |  |  |  |  |  |  |  |  |  |  |  |  |  |  |  |  |  |  |  |  |  |  |  |  |  |  |  |  |  |  |  |  |  |  |  |  |  |  |  |  |  |  |  |  |  |  |  |  |  |  |  |  |  |  |  |  |  |  |  |  |  |  |  |  |  |  |  |  |  |  |  |  |  |  |  |  |  |  |  |  |  |  |  |  |  |  |  |  |  |  |  |  |  |  |  |  |  |  |  |  |  |  |  |  |  |  |  |  |  |  |  |  |  |  |  |  |  |  |  |  |  |  |  |  |  |  |  |  |  |  |  |  |  |  |  |  |  |  |  |  |  |  |  |  |  |  |  |  |  |  |  |  |  |  |  |  |  |  |  |  |  |  |  |  |  |  |  |  |  |  |  |  |  |  |  |  |  |  |  |  |  |  |  |  |  |  |  |  |  |  |  |  |  |  |  |  |  |  |  |  |  |  |  |  |  |  |  |  |  |  |  |  |  |  |  |  |  |  |  |  |  |  |  |  |  |  |  |  |  |  |  |  |  |  |  |  |  |  |  |  |  |  |  |  |  |  |  |  |  |  |  |  |  |  |  |  |  |  |  |  |  |  |  |  |  |  |  |  |  |  |  |  |  |  |  |  |  |  |  |  |  |  |  |  |  |  |  |  |  |  |  |  |  |  |  |  |  |  |  |  |  |  |  |  |  |  |  |  |  |  |  | </ |
|--------------|-----|----|----|----|--|--|--|--|--|--|--|--|--|--|--|--|--|--|--|--|--|--|--|--|--|--|--|--|--|--|--|--|--|--|--|--|--|--|--|--|--|--|--|--|--|--|--|--|--|--|--|--|--|--|--|--|--|--|--|--|--|--|--|--|--|--|--|--|--|--|--|--|--|--|--|--|--|--|--|--|--|--|--|--|--|--|--|--|--|--|--|--|--|--|--|--|--|--|--|--|--|--|--|--|--|--|--|--|--|--|--|--|--|--|--|--|--|--|--|--|--|--|--|--|--|--|--|--|--|--|--|--|--|--|--|--|--|--|--|--|--|--|--|--|--|--|--|--|--|--|--|--|--|--|--|--|--|--|--|--|--|--|--|--|--|--|--|--|--|--|--|--|--|--|--|--|--|--|--|--|--|--|--|--|--|--|--|--|--|--|--|--|--|--|--|--|--|--|--|--|--|--|--|--|--|--|--|--|--|--|--|--|--|--|--|--|--|--|--|--|--|--|--|--|--|--|--|--|--|--|--|--|--|--|--|--|--|--|--|--|--|--|--|--|--|--|--|--|--|--|--|--|--|--|--|--|--|--|--|--|--|--|--|--|--|--|--|--|--|--|--|--|--|--|--|--|--|--|--|--|--|--|--|--|--|--|--|--|--|--|--|--|--|--|--|--|--|--|--|--|--|--|--|--|--|--|--|--|--|--|--|--|--|--|--|--|--|--|--|--|--|--|--|--|--|--|--|--|--|--|--|--|--|--|--|--|--|--|--|--|--|--|--|--|--|--|--|--|--|--|--|--|--|--|--|--|--|--|--|--|--|--|--|--|--|--|--|--|--|--|--|--|--|--|--|--|--|--|--|--|--|--|--|--|--|--|--|--|--|--|--|--|--|--|--|--|--|--|--|--|--|--|--|--|--|--|--|--|--|--|--|--|--|--|--|--|--|--|--|--|--|--|--|--|--|--|--|--|--|--|--|--|--|--|--|--|--|--|--|--|--|--|--|--|--|--|--|--|--|--|--|--|--|--|--|--|--|--|--|--|--|--|--|--|--|--|--|--|--|--|--|--|--|--|--|--|--|--|--|--|--|--|--|--|--|--|--|--|--|--|--|--|--|--|--|--|--|--|--|--|--|--|--|--|--|--|--|--|--|--|--|--|--|--|--|--|--|--|--|--|--|--|--|--|--|--|--|--|--|--|--|--|--|--|--|--|--|--|--|--|--|--|--|--|--|--|--|--|--|--|--|--|--|--|--|--|--|--|--|--|--|--|--|--|--|--|--|--|--|--|--|--|--|--|--|--|--|--|--|--|--|--|--|--|--|--|--|--|--|--|--|--|--|--|--|--|--|--|--|--|--|--|--|--|--|--|--|--|--|--|--|--|--|--|--|--|--|--|--|--|--|--|--|--|--|--|--|--|--|--|--|--|--|--|--|--|--|--|--|--|--|--|--|--|--|--|--|--|--|--|--|--|--|--|--|--|--|--|--|--|--|--|--|--|--|--|--|--|--|--|--|--|--|--|--|--|--|--|--|--|--|--|--|--|--|--|--|--|--|--|--|--|--|--|--|--|--|--|--|--|--|--|--|--|--|--|--|--|--|--|--|--|--|--|--|--|--|--|--|--|--|--|--|--|--|--|--|--|--|--|--|--|--|--|--|--|--|--|--|--|--|--|--|--|--|--|--|--|--|--|--|--|--|--|--|--|--|--|--|--|--|--|--|--|--|--|--|--|--|--|--|--|--|--|--|--|--|--|--|--|--|--|--|--|--|--|--|--|--|--|--|--|--|--|--|--|--|--|--|--|--|--|--|--|--|--|--|--|--|--|--|--|--|--|--|--|--|--|--|--|--|--|--|--|--|--|--|--|--|--|--|--|--|--|--|--|--|--|--|--|--|--|--|--|--|--|--|--|--|--|--|--|--|--|--|--|--|--|--|--|--|--|--|--|--|--|--|--|--|--|--|--|--|--|--|--|--|--|--|--|--|--|--|--|--|--|--|--|--|--|--|--|--|--|--|--|--|--|--|--|--|--|--|--|--|--|--|--|--|--|--|--|--|--|--|--|--|--|--|--|--|--|--|--|--|--|--|--|--|--|--|--|--|--|--|--|--|--|--|--|--|--|--|--|--|--|--|--|--|--|--|--|--|--|--|--|--|--|--|--|--|--|--|--|--|--|--|--|--|--|--|--|--|--|--|--|--|--|--|--|--|--|--|--|--|--|--|--|--|--|--|--|--|--|--|--|--|--|--|--|--|--|--|--|--|--|--|--|--|--|--|--|--|--|--|--|--|--|--|--|--|--|--|--|--|--|--|--|--|--|--|--|--|--|--|--|--|--|--|--|--|--|--|--|--|--|--|--|--|--|--|--|--|--|--|--|--|--|--|--|--|--|--|--|--|--|--|--|--|--|--|--|--|--|--|--|--|--|--|--|--|--|--|--|--|--|--|--|--|--|--|--|--|--|--|--|--|--|--|--|--|--|--|--|--|--|--|--|--|--|--|--|--|--|--|--|--|--|--|--|--|--|--|--|--|--|--|--|--|--|--|--|--|--|--|--|--|--|--|--|--|--|--|--|--|--|--|--|--|--|--|--|--|--|--|--|--|--|--|--|--|--|--|--|--|--|--|--|--|--|--|--|--|--|--|--|--|--|--|--|--|--|--|--|--|--|--|--|--|--|--|--|--|--|--|--|--|--|--|--|--|--|--|--|--|--|--|--|--|--|--|--|--|--|--|--|--|--|--|--|--|--|--|--|--|--|--|--|--|--|--|--|--|--|--|--|--|--|--|--|--|--|--|--|--|--|--|--|--|--|--|--|--|--|--|--|--|--|--|--|--|--|--|--|--|--|--|--|--|--|--|--|--|--|--|--|--|--|--|--|--|--|--|--|--|--|--|--|--|--|--|--|--|--|--|--|--|--|--|--|--|--|--|--|--|--|--|--|--|--|--|--|--|--|--|--|--|--|--|--|--|--|--|--|--|--|--|--|--|--|--|--|--|--|--|--|--|--|--|--|--|--|--|--|--|--|--|--|--|--|--|--|--|--|--|--|--|--|--|--|--|--|--|--|--|--|--|--|--|--|--|--|--|--|--|--|--|--|--|--|--|--|--|--|--|--|--|--|--|--|--|--|--|--|--|--|--|--|--|--|--|--|--|--|--|--|--|--|--|--|--|--|--|--|--|--|--|--|--|--|--|--|--|--|--|--|--|--|--|--|--|--|--|--|--|--|--|--|--|--|--|--|--|--|--|--|--|--|--|--|--|--|--|--|--|--|--|--|--|--|--|--|--|--|--|--|--|--|--|--|--|--|--|--|--|--|--|--|--|--|--|--|--|--|--|--|--|--|--|--|--|--|--|--|--|--|--|--|--|--|--|--|--|--|--|--|--|--|--|--|--|--|--|--|--|--|--|--|--|--|--|--|--|--|--|--|--|--|--|--|--|--|--|--|--|--|--|--|--|--|--|--|--|--|--|--|--|--|--|--|--|--|--|--|--|--|--|--|--|--|--|--|--|--|--|--|--|--|--|--|--|--|--|--|--|--|--|--|--|--|--|--|--|--|--|--|--|--|--|--|--|--|--|--|--|--|--|--|--|--|--|--|--|--|--|--|--|--|--|--|--|--|--|--|--|--|--|--|--|--|--|--|--|--|--|--|--|--|--|--|--|--|--|--|--|--|--|--|--|--|--|--|--|--|--|--|--|--|--|--|--|--|--|--|--|--|--|--|--|--|--|--|--|--|--|--|--|--|--|--|--|--|--|--|--|--|--|--|--|--|--|--|--|--|--|--|--|--|--|--|--|----|

180

days

**after**

the

**booster**

**dose**

V4

|                     |           |           |       |           |           |       |           |          |       |        |        |    |        |        |    |           |              |
|---------------------|-----------|-----------|-------|-----------|-----------|-------|-----------|----------|-------|--------|--------|----|--------|--------|----|-----------|--------------|
| <b>Seropositive</b> |           |           |       |           |           |       |           | 43       |       | 141    | 146    |    | 145    | 145    |    |           |              |
| <b>rate</b>         | 140 (99%) | 144 (99%) | 0.984 | 143 (98%) | 144 (99%) | 0.562 | 48 (100%) | (95.56%) | 0.140 | (100%) | (100%) | .a | (100%) | (100%) | .a | 48 (100%) | 45 (100%) .a |

**Table S3.** Geometric mean titre results.

|                                                           |                           | MICRONEUTRALISING        |                            |             |                         |                       |             |                         |                       |             | IGG                       |                            |             |                           |                           |             |                           |                           |             |
|-----------------------------------------------------------|---------------------------|--------------------------|----------------------------|-------------|-------------------------|-----------------------|-------------|-------------------------|-----------------------|-------------|---------------------------|----------------------------|-------------|---------------------------|---------------------------|-------------|---------------------------|---------------------------|-------------|
|                                                           |                           | CORONAVAC®               |                            |             | CHADOX1                 |                       |             | BNT162B2                |                       |             | CORONAVAC®                |                            |             | CHADOX1                   |                           |             | BNT162B2                  |                           |             |
| Time point                                                | Parameter                 | IndoVac®<br>vaccine      | BNT162b2<br>vaccine        | p-<br>Value | IndoVac®<br>vaccine     | BNT162b2<br>vaccine   | p-<br>Value | IndoVac®<br>vaccine     | BNT162b2<br>vaccine   | p-<br>Value | IndoVac®<br>vaccine       | BNT162b2<br>vaccine        | p-<br>Value | IndoVac®<br>vaccine       | BNT162b2<br>vaccine       | p-<br>Value | IndoVac®<br>vaccine       | BNT162b2<br>vaccine       | p-<br>Value |
| Before<br>booster V1                                      | Number of<br>participants | 147                      | 147                        |             | 149                     | 148                   |             | 49                      | 46                    |             | 147                       | 147                        |             | 149                       | 148                       |             | 49                        | 46                        |             |
|                                                           | GMT                       | 147.52                   | 151.75                     |             | 251.46                  | 250.80                |             | 237.49                  | 254.56                |             | 1874.67                   | 1875.98                    |             | 2882.57                   | 2791.88                   |             | 3054.24                   | 3521.95                   |             |
|                                                           | (95%CI)                   | (117.84–<br>184.66)      | (121.17–<br>190.04)        | 0.925       | (195.53–<br>323.38)     | (193.44–<br>325.18)   | 0.877       | (161.61–<br>348.99)     | (164.19–<br>394.66)   | 0.639       | (1535.96–<br>2288.064)    | 1547.907–<br>2273.596      | 0.548       | (2420.744–<br>3432.498)   | 2345.445–<br>3323.284     | 0.849       | (2313.516–<br>4032.119)   | (2540.014–<br>4883.475)   | 0.356       |
|                                                           | Median                    | 130.15                   | 184.13                     |             | 260.42                  | 184.13                |             | 260.42                  | 314.34                |             | 274.80                    | 243.32                     |             | 2863.90                   | 2793.70                   |             | 2896.20                   | 3698.20                   |             |
|                                                           | GMR                       | 0.97 (0.71– 1.33)        |                            |             | 1.00 (0.69–1.44)        |                       |             | 0.93 (0.52–1.66)        |                       |             | 1.00                      |                            |             | 1.03                      |                           |             | 0.87                      |                           |             |
|                                                           | (95%CI)                   |                          |                            |             |                         |                       |             |                         |                       |             | 0.758–1.316               |                            |             | (0.807– 1.319)            |                           |             | (0.568–1.321)             |                           |             |
| 14<br>days<br>after the<br>booster<br>dose V2             | Number of<br>participants | 147                      | 147                        |             | 149                     | 148                   |             | 49                      | 46                    |             | 147                       | 147                        |             | 149                       | 148                       |             | 49                        | 46                        |             |
|                                                           | GMT                       | 1266.69                  | 1982.51                    |             | 1320.43                 | 2142.50               |             | 1012.50                 | 2332.31               |             | 19838.60                  | 24525.31                   |             | 16329.26                  | 21992.70                  |             | 16877.87                  | 31913.82                  |             |
|                                                           | (95%CI)                   | (1014.73–<br>1581.21)    | (1659.79–<br>2367.96)      | 0.002*      | (1068.11–<br>1632.35)   | (1830.21–<br>2508.06) | 0.002*      | (710.50–<br>1442.85)    | (1706.79–<br>3187.06) | <0.001*     | (17326.833–<br>22714.492) | (22519.831–<br>26709.377)  | 0.232       | (14428.087–<br>18480.947) | 20092.897–<br>24072.124   | 0.001*      | (13795.343–<br>20649.178) | (28586.188–<br>35628.811) | <0.001*     |
|                                                           | Median                    | 1041.57                  | 2083.14                    |             | 1473.00                 | 2083.14               |             | 736.50                  | 2946.00               |             | 27756.40                  | 28821.60                   |             | 17259.30                  | 23597.20                  |             | 18724.10                  | 40000.00                  |             |
|                                                           | GMR                       | 0.64 (0.48 - 0.85)       |                            |             | 0.62 (0.47 - 0.80)      |                       |             | 0.43 (0.27 - 0.69)      |                       |             | 0.81                      |                            |             | 0.74                      |                           |             | 0.53 (0.419–0.666)        |                           |             |
|                                                           | (95%CI)                   |                          |                            |             |                         |                       |             |                         |                       |             | 0.689–0.948               |                            |             | (0.637–0.865)             |                           |             |                           |                           |             |
| 14<br>Days<br>After<br>Booster<br>Dose V2/<br>Baseline V1 | GM Fold<br>(95% CI)       | 8.59<br>(6.79–<br>10.85) | 13.06<br>(10.54–<br>16.19) |             | 5.25<br>(4.25–<br>6.49) | 8.54 (6.87–<br>10.62) |             | 4.26<br>(3.11–<br>5.84) | 9.16 (6.42–<br>13.07) |             | 10.58<br>(8.696–<br>15.7) | 13.07<br>(10.886–<br>15.7) |             | 5.66<br>(4.846–<br>6.621) | 7.88<br>(6.655–<br>9.322) |             | 5.53 (4.112–<br>7.425)    | 9.06 (6.625–<br>12.392)   | 0.01*       |
|                                                           | p-Value                   | <0.001*                  | <0.001*                    |             | <0.001*                 | <0.001*               |             | <0.001*                 | <0.001*               |             | <0.001*                   | <0.001*                    |             | <0.001*                   | <0.001*                   |             | <0.001*                   | <0.001*                   |             |
| 28<br>Days<br>After<br>Booster<br>Done V2                 | Number of<br>participants | 146                      | 146                        |             | 149                     | 148                   |             | 49                      | 46                    |             | 146                       | 146                        |             | 149                       | 148                       |             | 49                        | 46                        |             |
|                                                           | GMT                       | 1455.61                  | 1926.17                    |             | 1039.13                 | 1445.64               |             | 1019.69                 | 1661.66               |             | 18756.85                  | 17930.15                   |             | 15054.26                  | 16395.83                  |             | 17442.94                  | 26055.58                  |             |
|                                                           | (95%CI)                   | (1178.34–<br>1798.13)    | (1612.69–<br>2300.58)      | 0.042*      | (854.04–<br>1264.33)    | (1242.48–<br>1682.01) | 0.016*      | (735.06–<br>1414.51)    | (1250.91–<br>2207.26) | 0.006*      | (16508.38–<br>21311.553)  | (16151.925–<br>19904.141)  | 0.176       | (13412.56–<br>16896.89)   | (14826.32–<br>18131.50)   | 0.399       | (14540.464–<br>20924.783) | (22755.132–<br>29834.727) | 0.003*      |
|                                                           | Median                    | 1473.00                  | 2083.14                    |             | 1041.57                 | 1473.00               |             | 1041.57                 | 2083.14               |             | 23536.65                  | 18952.75                   |             | 15311.40                  | 18021.25                  |             | 19193.80                  | 31308.70                  |             |
|                                                           | GMR                       | 0.76 (0.57– 0.99)        |                            |             | 0.72 (0.56–59.93)       |                       |             | 0.61 (0.39–0.94)        |                       |             | 1.05                      |                            |             | 0.92                      |                           |             | 0.67 (0.533–0.839)        |                           |             |
|                                                           | (95%CI)                   |                          |                            |             |                         |                       |             |                         |                       |             | (0.887–1.232)             |                            |             | (0.788–1.069)             |                           |             |                           |                           |             |

|                        |                            |                  |                      |                     |                       |                      |                     |                     |                           |                        |                           |                         |                          |                          |
|------------------------|----------------------------|------------------|----------------------|---------------------|-----------------------|----------------------|---------------------|---------------------|---------------------------|------------------------|---------------------------|-------------------------|--------------------------|--------------------------|
| 28 days                |                            |                  |                      |                     |                       |                      |                     |                     |                           |                        |                           |                         |                          |                          |
| after the booster dose | the Number of participants | GM Fold (95% CI) | 10.05 (7.94–12.71)   | 12.59 (10.08–15.72) | 4.13 (3.35–5.09)      | 5.76 (4.56–7.28)     | 4.29 (3.22–5.72)    | 6.53 (4.62–9.21)    | 10.08 (8.235–12.333)      | 9.44 (7.891–11.286)    | 5.22 (4.472–6.098)        | 5.87 (4.995–6.904)      | 5.71 (4.333–7.527)       | 7.40 (5.463–10.017)      |
| baseline V1            |                            |                  |                      |                     |                       |                      |                     |                     |                           |                        |                           |                         |                          |                          |
| p-Value                |                            |                  | <0.001*              | <0.001*             | <0.001*               | <0.001*              | <0.001*             | <0.001*             | <0.001*                   | <0.001*                | <0.001*                   | <0.001*                 | <0.001*                  | <0.001*                  |
| 90 days                |                            |                  |                      |                     |                       |                      |                     |                     |                           |                        |                           |                         |                          |                          |
| after the booster dose | the Number of participants | GM Fold (95%CI)  | 145 (594.71–865.31)  | 147 (553.36–800.27) | 146 (1116.23–1638.39) | 146 (941.01–1323.01) | 49 (698.62–1310.40) | 45 (698.52–1529.29) | 145 (11197.778–14426.445) | 147 (7059.41–9052.707) | 146 (10338.929–12903.858) | 146 (7951.291–10073.25) | 49 (10502.196–15462.594) | 45 (11050.228–16850.839) |
| Median                 |                            |                  | 736.50               | 736.50              | 1473.00               | 1041.57              | 736.50              | 736.50              | 14208.70                  | 8311.80                | 12550.20                  | 9418.50                 | 13791.1                  | 1885.04                  |
| GMR (95%CI)            |                            |                  | 1.08 (0.83–1.40)     |                     | 1.21 (0.94–1.56)      |                      | 0.93 (0.57–1.51)    |                     | 1.59 (1.332–1.897)        |                        | 1.29 (1.098–1.516)        |                         | 0.93 (0.704–1.237)       |                          |
| 90 days                |                            |                  |                      |                     |                       |                      |                     |                     |                           |                        |                           |                         |                          |                          |
| after the booster dose | the Number of participants | GM Fold (95% CI) | 5.02 (3.94–6.39)     | 4.39 (3.51–5.47)    | 5.56 (4.18–7.39)      | 4.55 (3.48–5.94)     | 4.03 (2.89–5.62)    | 4.29 (3.05–6.01)    | 6.87 (5.531–8.524)        | 4.26 (3.591–5.055)     | 4.07 (3.377–4.906)        | 3.23 (2.739–3.805)      | 4.17 (3.196–5.445)       | 3.96 (2.942–5.316)       |
| V3/baseline V1         |                            |                  |                      |                     |                       |                      |                     |                     |                           |                        |                           |                         |                          |                          |
| p-Value                |                            |                  | <0.001*              | <0.001*             | <0.001*               | <0.001*              | <0.001*             | <0.001*             | <0.001*                   | <0.001*                | <0.001*                   | <0.001*                 | <0.001*                  | <0.001*                  |
| 180 days               |                            |                  |                      |                     |                       |                      |                     |                     |                           |                        |                           |                         |                          |                          |
| after the booster dose | the Number of participants | GM Fold (95% CI) | 141 (758.54–902.827) | 145 (589.70–699.78) | 145 (533.37–632.763)  | 145 (503.63–588.565) | 48 (463.94–626.039) | 45 (416.53–626.518) | 141 (1090.63–1246.474)    | 146 (629.27–721.481)   | 145 (953.66–1079.02)      | 145 (765.02–866.371)    | 48 (1012.94–1270.662)    | 45 (973.59–1234.94)      |
| Median                 |                            |                  | 736.50               | 736.50              | 520.73                | 520.73               | 520.73              | 520.73              | 1052.90                   | 628.07                 | 1002.61                   | 760.08                  | 1002.91                  | 946.43                   |
